# Supplementary material
Source: PubMed Central journal article supplement (PMC5546242)
Supplement: NIHMS879773-supplement-1.pdf [file NIHMS879773-supplement-1.pdf]

## The International Mouse Phenotyping Consortium

Terrence F. Meehan<sup>1\*</sup>, Nathalie Conte<sup>1\*</sup>, Jeremy Mason<sup>1</sup>, Jonathan Warren<sup>1</sup>, Chao-Kung Chen<sup>1</sup>, Ilinca Tudose<sup>1</sup>, Mike Relac<sup>1</sup>, Peter Matthews<sup>1</sup>, Helen Parkinson<sup>1</sup>, Paul Flicek<sup>1</sup>, David B. West<sup>2\*</sup>, Julius O. Jacobsen<sup>3</sup>, Damian Smedley<sup>3</sup>, Jacqueline K. White<sup>4</sup>, Allan Bradley<sup>4</sup>, William C. Skarnes<sup>4</sup>, David J. Adams<sup>4</sup>, Natasha Karp<sup>4</sup>, Caroline Sinclair<sup>4</sup>, Ellen Brown<sup>4</sup>, Brendan Doe<sup>4</sup>, Hannah Wardle-Jones<sup>4</sup>, Evelyn Grau<sup>4</sup>, Nicola Griggs<sup>4</sup>, Mike Woods<sup>4</sup>, Helen Kundi<sup>4</sup>, Mark N. D. Griffiths<sup>4</sup>, Christian Kipp<sup>4</sup>, David G. Melvin<sup>4</sup>, Navis P. S. Raj<sup>4</sup>, Simon A. Holroyd<sup>4</sup>, David J. Gannon<sup>4</sup>, Rafael Alcantara<sup>4</sup>, Antonella Galli<sup>4</sup>, Yvette E. Hooks<sup>4</sup>, Catherine L. Tudor<sup>4</sup>, Angela L. Green<sup>4</sup>, Fiona L. Kussy<sup>4</sup>, Elizabeth J. Tuck<sup>4</sup>, Emma J. Siragher<sup>4</sup>, Simon A. Maguire<sup>4</sup>, David T. Lafont<sup>4</sup>, Valerie E. Vancollie<sup>4</sup>, Selina A. Pearson<sup>4</sup>, Amy S. Gates<sup>4</sup>, Mark Sanderson<sup>4</sup>, Carl Shannon<sup>4</sup>, Lauren F.E. Anthony<sup>4</sup>, Maksymilian T. Sumowski<sup>4</sup>, Robbie S.B. McLaren<sup>4</sup>, Agnieszka Swiatkowska<sup>4</sup>, Christopher M. Isherwood<sup>4</sup>, Emma L. Cambridge<sup>4</sup>, Heather M. Wilson<sup>4</sup>, Susana S. Caetano<sup>4</sup>, Cecilia Icoresi Mazzeo<sup>4</sup>, Monika H. Dabrowska<sup>4</sup>, Charlotte Lillistone<sup>4</sup>, Jeanne Estabel<sup>4</sup>, Anna Karin B. Maguire<sup>4</sup>, Laura-Anne Roberson<sup>4</sup>, Christopher J. Lelliott<sup>4</sup>, Ramiro Ramirez-Solis<sup>4</sup>, Anneliese O. Speak<sup>4</sup>, Sara Wells<sup>5</sup>, Ann-Marie Mallon<sup>5</sup>, Steve D.M. Brown<sup>5</sup>, Luis Santos<sup>5</sup>, Tanja Fiegel<sup>5</sup>, Natalie Ring<sup>5</sup>, Henrik Westerberg<sup>5</sup>, Simon Greenaway<sup>5</sup>, Duncan Sneddon<sup>5</sup>, Hugh Morgan<sup>5</sup>, Gemma F Codner<sup>5</sup>, Michelle E Stewart<sup>5</sup>, James Brown<sup>5</sup>, Neil Horner<sup>5</sup>, Heather L Cater<sup>5</sup>, Helen P Natukunda<sup>5</sup>, James Cleak<sup>5</sup>, Lydia M Teboul<sup>5</sup>, Sara J Johnson<sup>5</sup>, Sharon Clementson-Mobbs<sup>5</sup>, Tertius A Hough<sup>5</sup>, Zsombor Szoke-Kovacs<sup>5</sup>, Alison P Walling<sup>5</sup>, Jorik Loeffler<sup>5</sup>, Melissa Haendel<sup>7</sup>, Nicole Washington<sup>8</sup>, Christopher J. Mungall<sup>8</sup>, Corey L Reynolds<sup>9</sup>, Juan Gallegos<sup>9</sup>, Arturo Garza<sup>9</sup>, Elise Mangin<sup>9</sup>, Joel Sederstrom<sup>9</sup>, Angelina Gasparo<sup>9</sup>, Iride Lazo<sup>9</sup>, Jen Greene<sup>9</sup>, Kate Mowrey<sup>9</sup>, Ritu Bohat<sup>9</sup>, Rodney Samaco<sup>9</sup>, Surabi Veeraragavan<sup>9</sup>, Beeton Christine<sup>9</sup>, Chinwe Asomugha<sup>9</sup>, Sowmya Kalaga<sup>9</sup>, John Seavitt<sup>9</sup>, Arthur L. Beaudet<sup>9</sup>, Mary E. Dickinson<sup>9</sup>, Valerie Gailus-Durner<sup>10</sup>, Robert Brommage<sup>10</sup>, Sabine M Hoelter<sup>10</sup>, Christoph Lengger<sup>10</sup>, Frauke Neff<sup>10</sup>, Lore Becker<sup>10</sup>, Helmut Fuchs<sup>10</sup>, Birgit Rathkolb<sup>10</sup>, Jan Rozman<sup>10</sup>, Lillian Garrett<sup>10</sup>, Oana V Amarie<sup>10</sup>, Kristin Moreth<sup>10</sup>, Ralph Steinkamp<sup>10</sup>, Wolfgang Wurst<sup>10</sup>, Martin Hrabe de Angelis<sup>10</sup>, Holger Maier<sup>10</sup>, Tania Sorg<sup>11 12 13 14</sup>, Guillaume Pavlovic<sup>11 12 13 14</sup>, Yann Herault<sup>11 12 13 14</sup>, Abdel Ayadi<sup>11 12 13 14</sup>, Mohammed Selloum<sup>11 12 13 14</sup>, Dalila Ali-Hadji<sup>11 12 13 14</sup>, Ghina Bou About<sup>11 12 13 14</sup>, Hamid Meziane<sup>11 12 13 14</sup>, Hughes Jacobs<sup>11 12 13 14</sup>, Laurent Vasseur<sup>11 12 13 14</sup>, Marie Wattenhofer-Donze<sup>11 12 13 14</sup>, Marie-Christine Birling<sup>11 12 13 14</sup>, Marie-France Champy<sup>11 12 13 14</sup>, Patrick Reilly<sup>11 12 13 14</sup>, Philippe André<sup>11 12 13 14</sup>, Sylvie Jacquot<sup>10 11 12 13</sup>, K.C. Kent Lloyd<sup>15</sup>, Lynette R Bower<sup>15</sup>, Joshua A Wood<sup>15</sup>, Milton M Pham<sup>15</sup>, Shinya Ayabe<sup>15</sup>, Mark Moore<sup>16</sup>, Frank Benso<sup>17</sup>, Iva Morse<sup>17</sup>, Xiang Gao<sup>18</sup>, Glauco P Tocchini-Valentini<sup>19</sup>, Raffaele Matteoni<sup>19</sup>, Marcello Raspa<sup>19</sup>, Alessia Gambadoro<sup>19</sup>, Aline Rauch<sup>19</sup>, Chiara Di Pietro<sup>19</sup>, Daniela Marazziti<sup>19</sup>, Elisabetta Golini<sup>19</sup>, Ferdinando Scavizzi<sup>19</sup>, Filomena Ferrara<sup>19</sup>, Francesco Chiani<sup>19</sup>, Gianfranco Di Segni<sup>19</sup>, Gianfranco Rossi<sup>19</sup>, Gina La Sala<sup>19</sup>, Giuseppe D Tocchini-Valentini<sup>19</sup>, Marzia Massimi<sup>19</sup>, Miriam Pasquini<sup>19</sup>, Nicoletta Rossi<sup>19</sup>, Olga Ermakova<sup>19</sup>, Paolo Fruscoloni<sup>19</sup>, Sabrina Putti<sup>19</sup>, Serena Gastaldi<sup>19</sup>, Silvia Mandillo<sup>19</sup>, Tiziana Orsini<sup>19</sup>, Yuichi Obata<sup>20</sup>, Hideki Kaneda<sup>20</sup>, Ikuko Yamada<sup>20</sup>, Ikuo Miura<sup>20</sup>, Kimio Kobayashi<sup>20</sup>, Masaru Tamura<sup>20</sup>, Shigeharu Wakana<sup>20</sup>, Tamio Furuse<sup>20</sup>, Tomohiro Suzuki<sup>20</sup>, Hiroshi Masuya<sup>20</sup>, Nobuhiko Tanaka<sup>20</sup>, Atsushi Yoshiki<sup>20</sup>, Gillian Sleep<sup>20</sup>, Hibret Adissu<sup>21</sup>, Mark Henkelman<sup>21</sup>, Lois Kelsey<sup>21</sup>, Igor Vukobradovic<sup>21</sup>, Zorana Berberovic<sup>21</sup>, Celeste Owen<sup>21</sup>, Dawei Qu<sup>21</sup>, Ruolin Guo<sup>21</sup>, Elsa Jacob<sup>21</sup>, Ozge Danisment<sup>21</sup>, Patricia Penton<sup>21</sup>, Amie Creighton<sup>21</sup>,

Lily Morikawa<sup>21</sup>, Napoleon Law<sup>21</sup>, Xueyuan Shang<sup>21</sup>, Patricia Feugas<sup>21</sup>, Yanchun Wang<sup>21</sup>, Mohammad Eskandarian<sup>21</sup>, Yingchun Zhu<sup>21</sup>, Marina Gertsenstein<sup>21</sup>, Monica Pereira<sup>21</sup>, Sue MacMaster<sup>21</sup>, Sandra Tondat<sup>21</sup>, Tracy Carroll<sup>21</sup>, Valerie Laurin<sup>21</sup>, Shannon Clarke<sup>21</sup>, Qing Lan<sup>21</sup>, Ann M Flenniken<sup>21</sup>, Lauryl MJ Nutter<sup>21</sup>, Susan Newbigging<sup>21</sup>, Colin McKerlie<sup>21</sup>, Monica J. Justice<sup>22</sup>, Stephen A. Murray<sup>23</sup>, Karen L. Svenson<sup>23</sup>, Robert E. Braun<sup>23</sup>

<sup>1</sup>European Molecular Biology Laboratory, European Bioinformatics Institute, Wellcome Trust Genome Campus, Hinxton, Cambridge CB10 1SD, UK

<sup>2</sup>Children's Hospital Oakland Research Institute, Oakland, California 94609, USA

<sup>3</sup>William Harvey Research Institute, Queen Mary University of London, London, E1 4NS, UK

<sup>4</sup>The Wellcome Trust Sanger Institute, Wellcome Trust Genome Campus, Hinxton, Cambridge CB10 1SA, UK

<sup>5</sup>Medical Research Council Harwell (Mammalian Genetics Unit and Mary Lyon Centre), Harwell, Oxfordshire OX11 0RD, UK

<sup>6</sup>The International Mouse Phenotyping Consortium

<sup>7</sup>Department of Medical Informatics and Clinical Epidemiology and OHSU Library, Oregon Health & Science University, Portland, OR, 97239, USA

<sup>8</sup>Division of Environmental Genomics and Systems Biology, Lawrence Berkeley National Laboratory, Berkeley, CA 94720, USA

<sup>9</sup>Department of Molecular and Human Genetics, Baylor College of Medicine, Houston, Texas 77030, USA

<sup>10</sup>Helmholtz Zentrum München, German Research Center for Environmental Health, Institute of Experimental Genetics, Neuherberg 85764, Germany

<sup>11</sup>CELPEDIA, PHENOMIN, Institut Clinique de la Souris (ICS), 1 rue Laurent Fries, F-67404 Illkirch-Graffenstaden, France

<sup>12</sup>Institut de Génétique et de Biologie Moléculaire et Cellulaire (IGBMC), Université de Strasbourg, Illkirch, France

<sup>13</sup>Centre National de la Recherche Scientifique, UMR7104, Illkirch, France

<sup>14</sup>Institut National de la Santé et de la Recherche Médicale, U964, Illkirch, France

<sup>15</sup>Mouse Biology Program, University of California, Davis, California 95618, USA

<sup>16</sup>IMPC, San Anselmo, California 94960, USA

<sup>17</sup>Charles River Laboratories, Wilmington, Massachusetts 01887, USA

<sup>18</sup>SKL of Pharmaceutical Biotechnology and Model Animal Research Center, Collaborative Innovation Center for Genetics and Development, Nanjing Biomedical Research Institute, Nanjing University, Nanjing 210061, China

<sup>19</sup>Monterotondo Mouse Clinic, Italian National Research Council (CNR), Institute of Cell Biology and Neurobiology, Monterotondo Scalo I-00015, Italy

<sup>20</sup>RIKEN BioResource Center, Tsukuba, Ibaraki 305-0074, Japan

<sup>21</sup>The Centre for Phenogenomics, Toronto, Ontario M5T 3H7, Canada

<sup>22</sup>Mouse Imaging Centre, The Hospital for Sick Children, Toronto, Ontario M5T 3H7, Canada

<sup>23</sup>The Jackson Laboratory, Bar Harbor, Maine 04609, USA
